# Supplementary material
Source: publisher figshare collection journal article supplement (https://tandf.figshare.com/ndownloader/files/7266479)
Supplement: Supplementary file 1 [file 7266479]

**Supplementary material**

**Copper(II), Cobalt(II) and Nickel(II) Complexes of Lapachol: Synthesis, DNA interaction and Cytotoxicity**

**Leila Tabrizi,Faranak Talaie, Hossein Chiniforoshan ***

*Department of Chemistry, Isfahan University of Technology, Isfahan 84156-83111, Iran*

**Corresponding author: H. Chiniforoshan; Email: Chinif@cc.iut.ac.ir*

*Tel: +983133913261; fax: +983133912350*


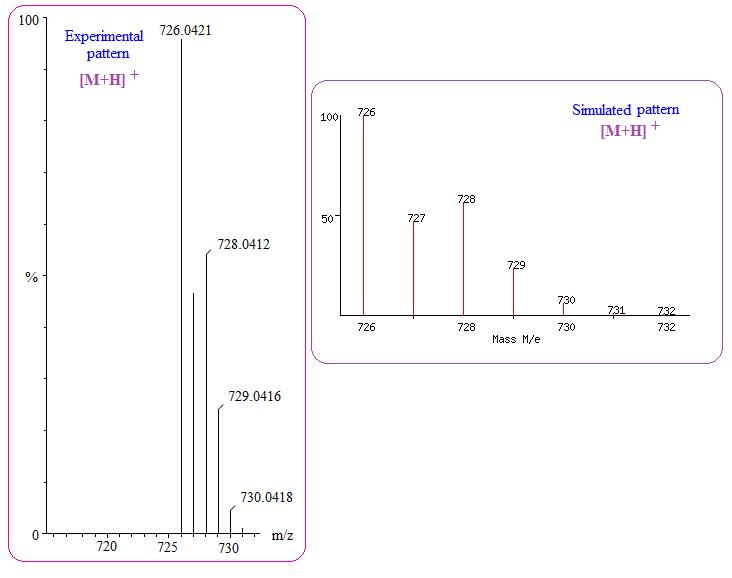


**Fig.S1.** TOF-MS spectra of complex [Cu(Lap)2(phen)], **1**


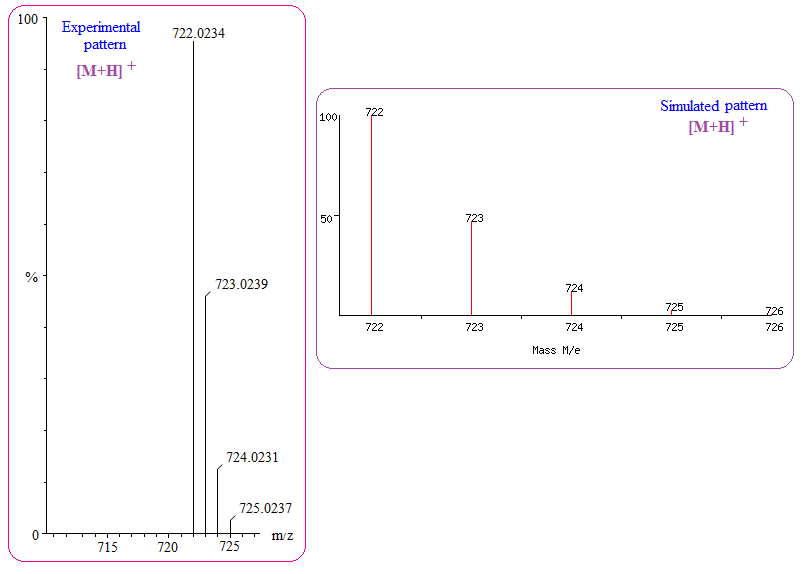


**Fig.S2.** TOF-MS spectra of complex [Co(Lap)2(phen)], **2**


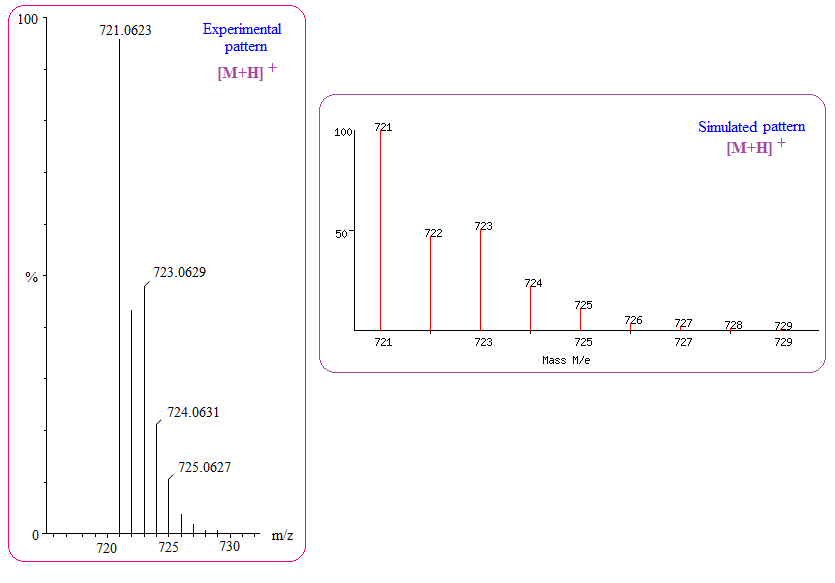


**Fig.S3.** TOF-MS spectra of complex [Ni(Lap)2(phen)], **3**


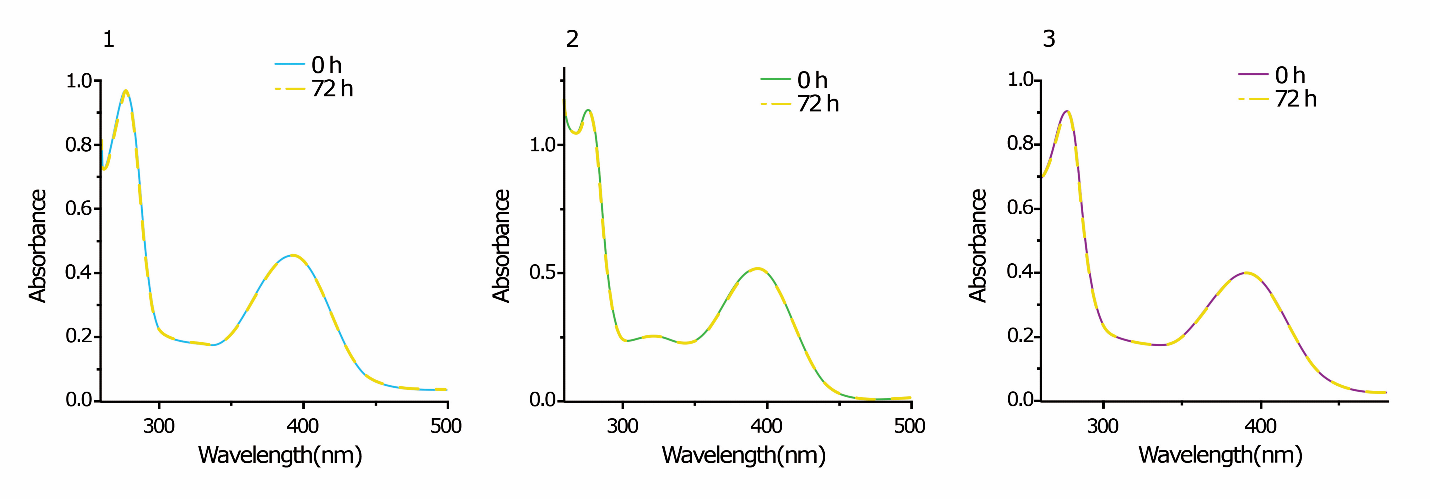


**Fig. S4.** UV–vis absorption spectra of complex **1**-**3** in Tris buffer (10 mM Tris-HCl/10 mM NaCl, pH = 7.2, T = 37 º C) at 0h and 72h.

**
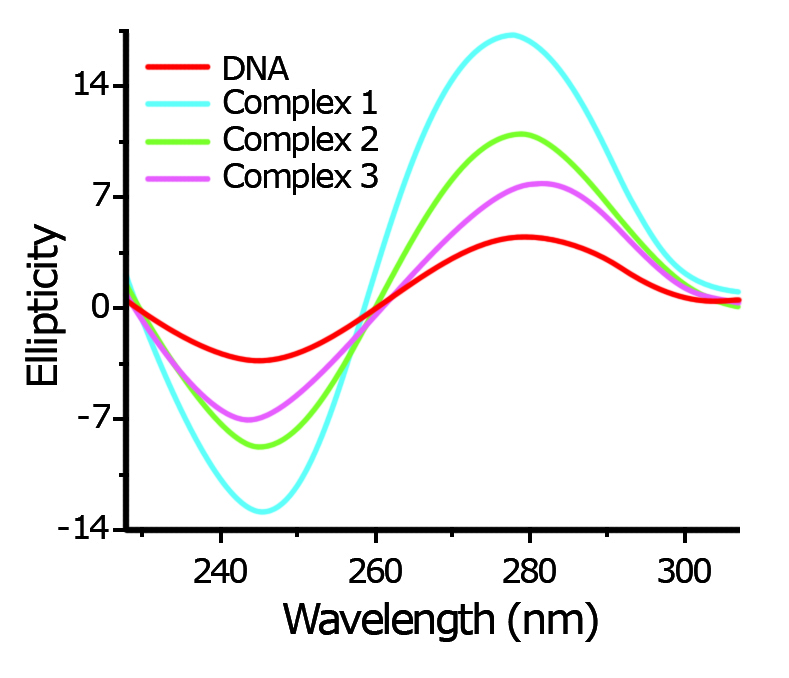
**

**Fig. S5.** The circular dichroism spectra of free CT-DNA (10 μm) and after the addition of the complexes **1**-**3** (10 μm) at 37 °C.


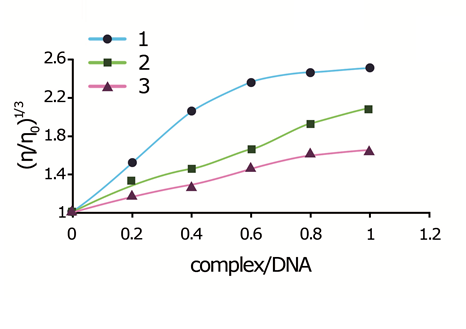


**Fig. S6.** Effect of increasing amounts of complexes **1**-**3** on the relative viscosity of CT DNA at 37 °C in 5 mM Tris–HCl / 50 mM NaCl buffer (pH 7.2, [DNA] = 0.1 mM).


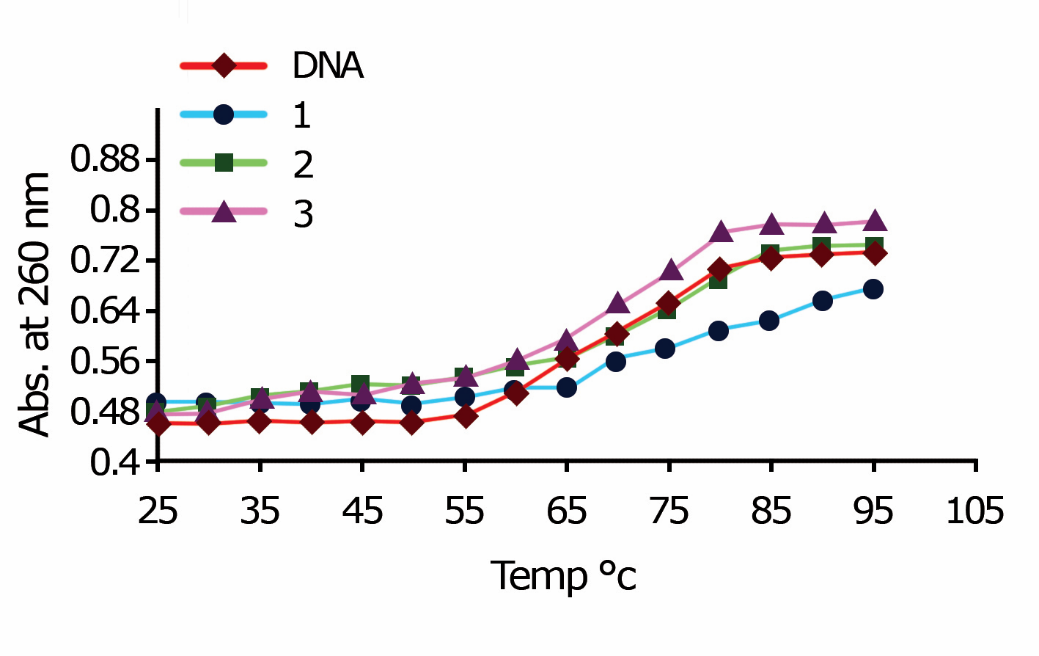


**Fig. S7.** Thermal denaturation graph of DNA (0.4 mM) in the presence of complexes **1**-**3** (20 µM).
